# Supplementary material
Source: Springer Nature journal article supplement (https://springermedizin.de/resource/supplementary/12885_2009_1544_MOESM2_ESM.pdf/9472282)

(1) resistance/impact loading      resistance/impact loading

(2) resistance/cardio (clinic)      resistance/cardio (home)

(3) usual care + printed material      cycling (non impact) cardio

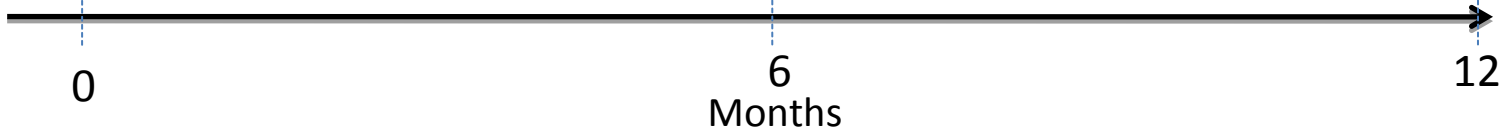

Supplement: MOESM2 [file 9472282]
